# Supplementary material for: IL-18 associated with lung lymphoid aggregates drives IFNγ production in severe COPD
Source: Springer Nature journal article supplement (doi:10.1186/s12931-017-0641-7), 2017-08-22
Supplement: MOESM2 [file 14233174]

## **IL-18 associated with lung lymphoid aggregates drives IFN $\gamma$ production in severe COPD**

Emmanuel Briend <sup>a,1</sup>, John G. Ferguson <sup>a</sup>, Michiko Mori <sup>c</sup>, Gautam Damera <sup>b</sup>, Katherine Stephenson <sup>a,2</sup>, Natasha A.Karpf <sup>f</sup>, Sanjay Sethi <sup>e</sup>, Christine K. Ward <sup>b,3</sup>, Matthew A. Sleeman <sup>a,4</sup>, Jonas S. Erjefält <sup>c,d</sup>, and Donna K. Finch <sup>a,5</sup>

<sup>a</sup>MedImmune Ltd, Granta Park, Cambridge CB21 6GH, United Kingdom

<sup>b</sup>MedImmune LLC, 1 MedImmune Way, Gaithersburg, MD, USA

<sup>c</sup>Department of Experimental Medical Science, BMC D12, Lund University, SE-221 84, Lund, Sweden

<sup>d</sup>Department of Respiratory Medicine and Allergology, Lund University Hospital, Lund, Sweden

<sup>e</sup>Department of Medicine, University at Buffalo, 3495 Bailey Avenue, Buffalo NY 14215, USA

<sup>f</sup>Quantitative Biology IMED, AstraZeneca R&D, Cambridge, UK

<sup>1</sup>Current affiliation: Agenus Ltd, Cambridge, UK

<sup>2</sup>Current affiliation: University of Nottingham, UK

<sup>3</sup>Current affiliation: Bristol-Myers Squibb, Princeton, NJ, USA

<sup>4</sup>Current affiliation: Regeneron Pharmaceuticals Inc, Tarrytown, NY, USA

<sup>5</sup>Corresponding author:

Donna Finch PhD,

MedImmune Ltd,

Granta Park,

Cambridge CB21 6GH, United Kingdom

Tel: +44 (0)1223 471471

Fax: +44 (0)1223 471472

[Finchd@medimmune.com](mailto:Finchd@medimmune.com)

# Supplementary figures

# Supplementary Figure 1

Stable

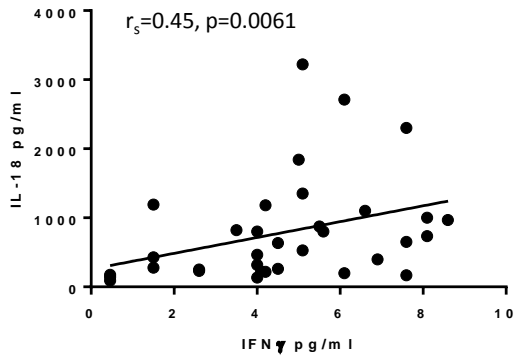

Exacerbation

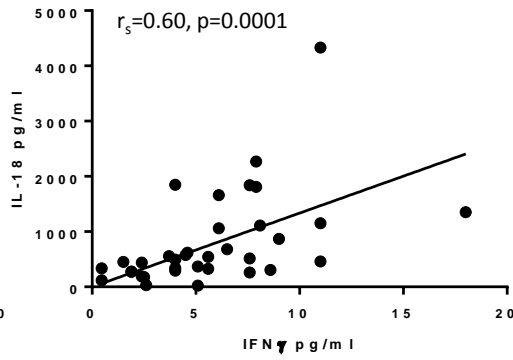

Convalescence

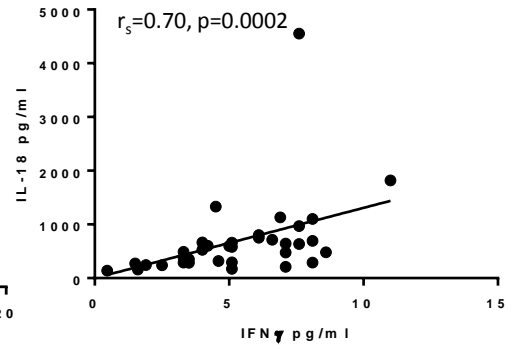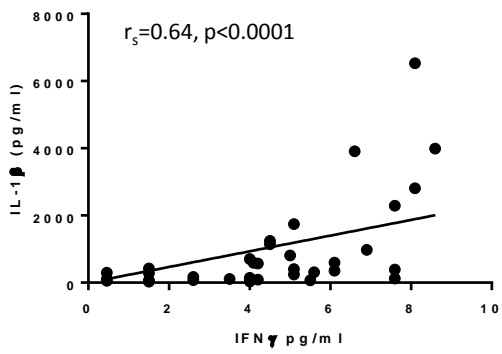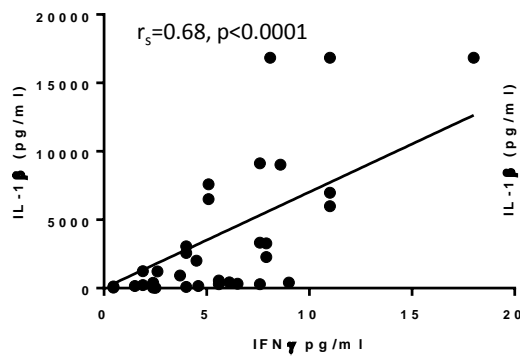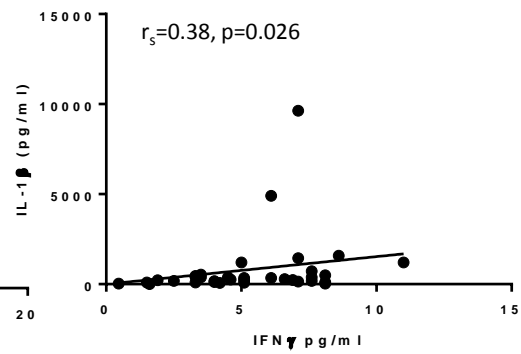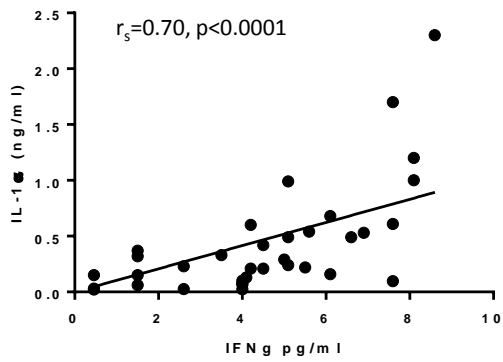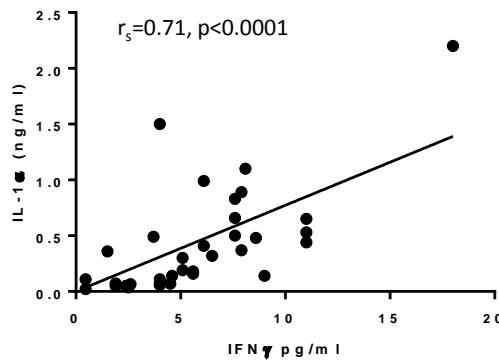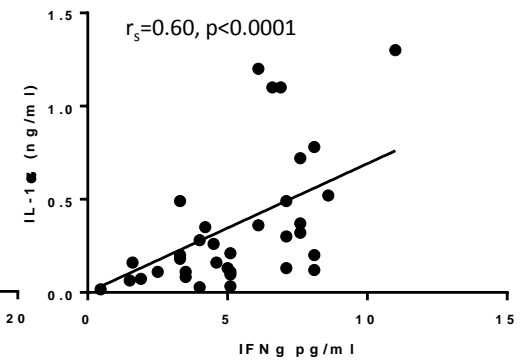

## Supplementary Figure 2

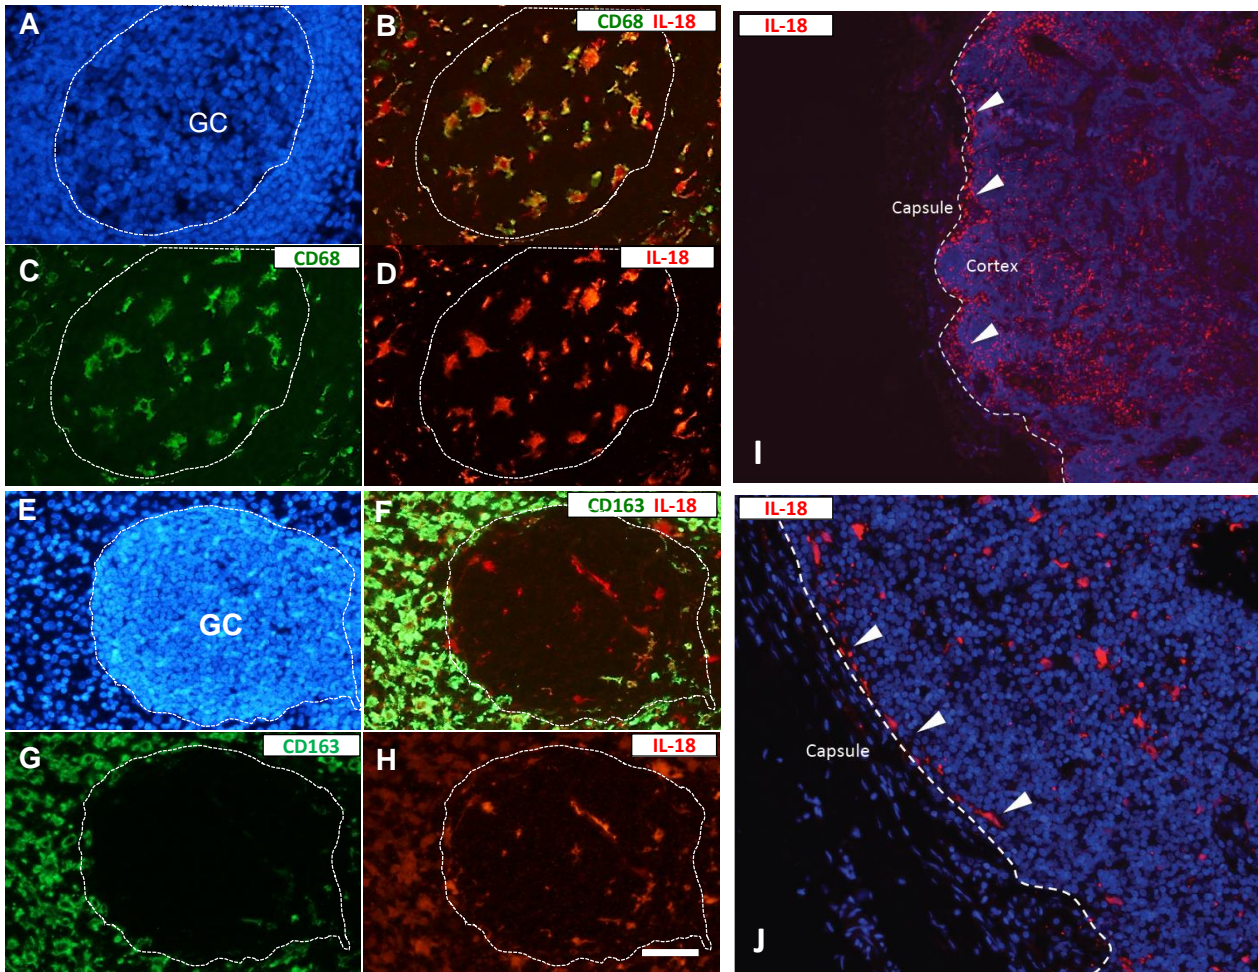

(A-H) Immunofluorescence staining of lung draining lymph nodes identifying IL-18 expressing cells based on the markers CD68 and CD163. Cell nuclei were stained with Hoechst 33342 (A, E, blue). Cells were stained for CD68 (C, green), CD163 (G, green) and IL-18 (D, H, red). The overlay of IL-18 staining with either CD68 or CD163 is shown in (B) and (F) respectively. Most CD68<sup>+</sup> cells within the germinal center or in the T cell area were IL-18<sup>+</sup>. Some IL-18<sup>+</sup> CD163<sup>+</sup> cells were observed outside the germinal center.

(I-J) Immunofluorescence staining of IL-18 (red) in lung draining lymph nodes exemplifying the presence of IL-18 positive macrophage-like cells in the subcapsular region (arrows) as well as in the cortex.
